# Supplementary material for: Qualitative and quantitative assessment of genotoxins usingSRRzlysis reporter under the control of a newly designed SOS responsive promoter inEscherichia coli
Source: Royal Society of Chemistry journal article supplement (doi:10.1039/c9ra06202e), 2019-01-01
Supplement: c9ra06202e1.pdf [file c9ra06202e1.pdf]

1 **Supplementary material**

2 **Qualitative and quantitative assessment of genotoxins**  
3 **using *SRRz* lysis reporter under the control of a new**  
4 **designed SOS responsive promoter in *Escherichia coli***

5 Pengfei Yuan<sup>a</sup>, Junqing Dong<sup>a</sup>, Min Zhuo<sup>a,\*</sup>, Shuang Li<sup>a,\*</sup>, Shaobin Huang<sup>b</sup>, Jianjun

6 Li<sup>c</sup>

7

8 <sup>a</sup> *School of Biology and Biological Engineering, South China University of*

9 *Technology, Higher Education Mega Center, Guangzhou 510006, China*

10 <sup>b</sup> *School of Environment and Energy, South China University of Technology, Higher*

11 *Education Mega Center, Guangzhou 510006, China*

12 <sup>c</sup> *State Key Laboratory of Applied Microbiology Southern China, Guangdong*

13 *Provincial Key Laboratory of Microbial Culture Collection and Application,*

14 *Guangdong Institute of Microbiology, Guangzhou 510070, China*

15

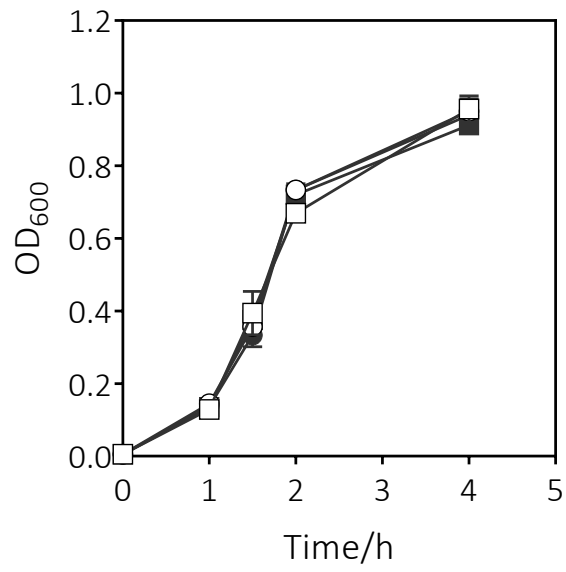

16

17 **Fig. S1** Growth curves of *E. coli* strains of BL21/pUC18 (circle), BL21/pUC18-PST  
18 (square). Solid symbols indicate that no DMSO was added, while hollow ones indicate  
19 that DMSO was added.

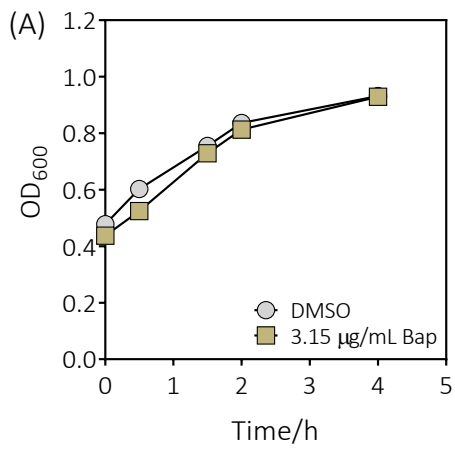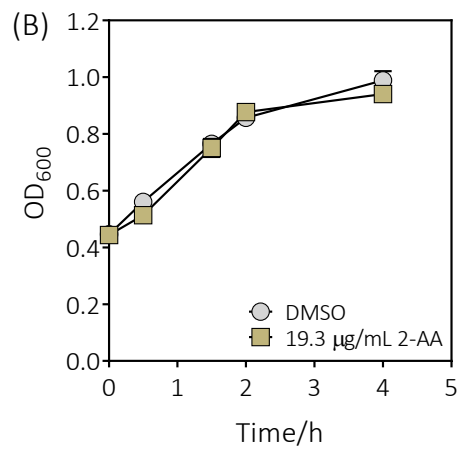

20

21 **Fig. S2** Effects of 31.5 µg/mL BaP (A) and 19.3 µg/mL 2-AA (B) on the cell growth

22 of *E. coli* BL21/pUC18-PST.

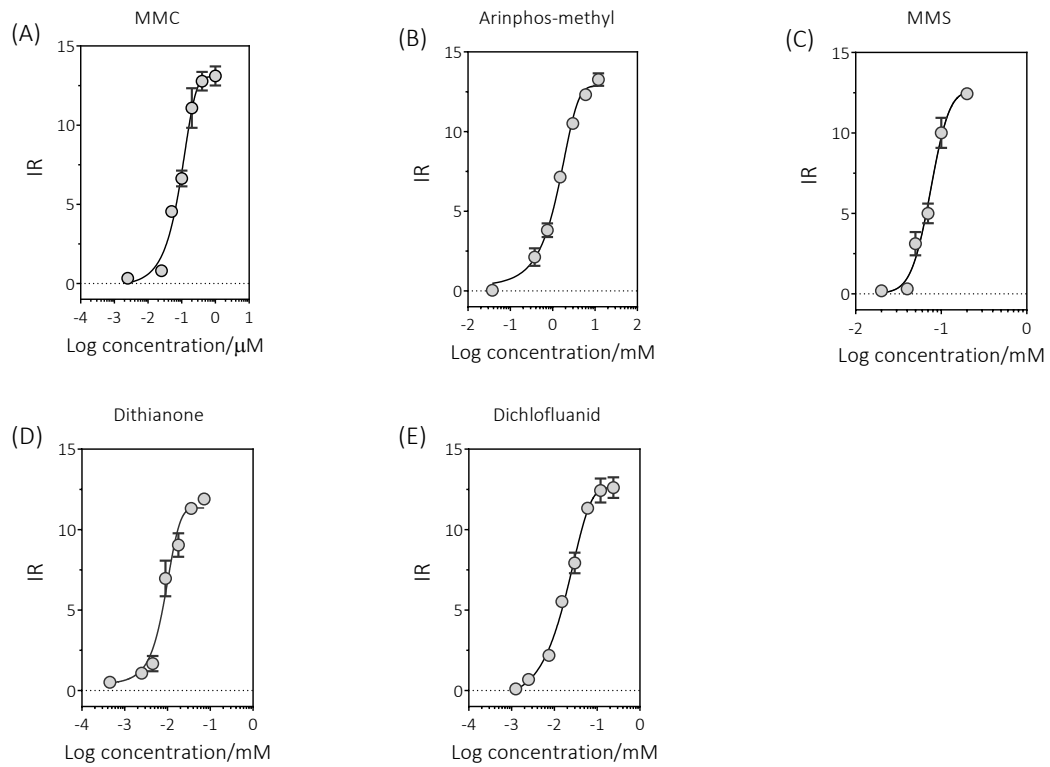

23

24 **Fig. S3** Semi-logarithm concentration-induction ratio curves of *E. coli* BL21/pUC18-

25 PST contact with MMC (A), arinphos-methyl (B), MMS (C), dithianone (D) and

26 dichlofluanid (E).

27

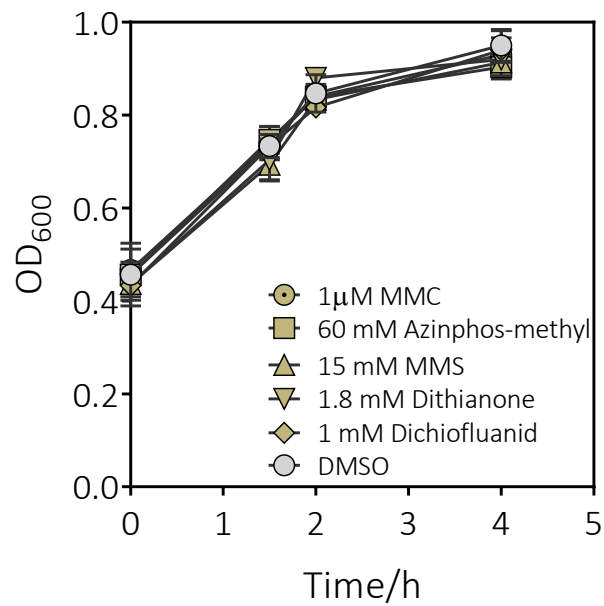

28

29 **Fig. S4** Effects of 1  $\mu$ M MMC, 60 mM azinphos-methyl, 15 mM MMS, 1.8 mM  
30 dithianone and 1 mM dichiofluanid and DMSO on *E. coli* BL21/pUC-18 cell growth,  
31 respectively. When the OD<sub>600</sub> reached about 0.4, different chemicals were added to the  
32 cell culture, and the time at this time was recorded as zero point. The cell densities  
33 (OD<sub>600</sub>) were measured over time.

34 **Table S1** Chemicals concentration in mixture experiments ( $\mu\text{M}$ )

| Experiment | MMC    | Azinphos-methyl | MMS  | Dithianone | Dichlofluanid |
|------------|--------|-----------------|------|------------|---------------|
| 1          | □      | □               | 44.2 | 5.6        | □             |
| 2          | □      | 728.3           | □    | 5.6        | □             |
| 3          | □      | □               | □    | 5.6        | 11.9          |
| 4          | 0.0486 | □               | □    | 5.6        | □             |
| 5          | □      | 728.3           | 44.2 | □          | □             |
| 6          | □      | □               | 44.2 | □          | 11.9          |
| 7          | 0.0486 | □               | 44.2 | □          | □             |
| 8          | □      | 728.3           | □    | □          | 11.9          |
| 9          | 0.0486 | 728.3           | □    | □          | □             |
| 10         | 0.0486 | □               | □    | □          | 11.9          |
| 11         | □      | 728.3           | 44.2 | 5.6        | □             |
| 12         | □      | □               | 44.2 | 5.6        | 11.9          |
| 13         | 0.0486 | □               | 44.2 | 5.6        | □             |
| 14         | □      | 728.3           | □    | 5.6        | 11.9          |
| 15         | 0.0486 | 728.3           | □    | 5.6        | □             |
| 16         | 0.0486 | □               | □    | 5.6        | 11.9          |
| 17         | □      | 728.3           | 44.2 | □          | 11.9          |
| 18         | 0.0486 | 728.3           | 44.2 | □          | □             |
| 19         | 0.0486 | □               | 44.2 | □          | 11.9          |
| 20         | 0.0486 | 728.3           | □    | □          | 11.9          |

35
